# Supplementary material for: Presence of p25alpha-Domain in Seed Plants (Spermatophyta): Microbial/Animal Contaminations and/or Orthologs
Source: MDPI journal article supplement (doi:10.3390/life13081664), 2023-07-30
Supplement: s1 [file s1]

**Table S1.** Accession Numbers of proteins shown in Figures 2-5<sup>1</sup>

| Name on the Figures | Species                                   | Phylum             | NCBI Accession No.           |
|---------------------|-------------------------------------------|--------------------|------------------------------|
| <b>Figure 2</b>     |                                           |                    |                              |
| Allomyces           | <i>Allomyces macrogynus</i>               | Blastocladiomycota | KNE68590                     |
| Amoeboaphelidium    | <i>Amoeboaphelidium<br/>protococcarum</i> | Aphelidiomycota    | KAI3631655                   |
| Batrachochytrium    | <i>Batrachochytrium dendrobatidis</i>     | Chytridiomycota    | XP_006680205                 |
| Blyttiomycetes      | <i>Blyttiomycetes helicus</i>             | Chytridiomycota    | RKO89614                     |
| Catenaria           | <i>Catenaria anguillulae</i>              | Blastocladiomycota | ORZ33943                     |
| Chytridium1         | <i>Chytridium lagenaria</i>               | Chytridiomycota    | KAI8852913                   |
| Chytridium2         | <i>Chytridium lagenaria</i>               | Chytridiomycota    | KAI8846486                   |
| Chytriomyces1       | <i>Chytriomyces confervae</i>             | Chytridiomycota    | TPX65886                     |
| Chytriomyces2       | <i>Chytriomyces confervae</i>             | Chytridiomycota    | TPX72533                     |
| Cladochytrium       | <i>Cladochytrium replicatum</i>           | Chytridiomycota    | KAI8806435                   |
| Entophlyctis        | <i>Entophlyctis helioformis</i>           | Chytridiomycota    | KAI8924042                   |
| Fimicolochytrium    | <i>Fimicolochytrium jonesii</i>           | Chytridiomycota    | XP_052926454                 |
| Gaertneriomyces     | <i>Gaertneriomyces semiglobifer</i>       | Chytridiomycota    | KAI9004733                   |
| Globomyces          | <i>Globomyces pollinis-pini</i>           | Chytridiomycota    | KAI8893030                   |
| Gorgonomycetes      | <i>Gorgonomycetes haynaldii</i>           | Chytridiomycota    | KAI8912588                   |
| Obelidium1          | <i>Obelidium mucronatum</i>               | Chytridiomycota    | KAI9351240                   |
| Obelidium2          | <i>Obelidium mucronatum</i>               | Chytridiomycota    | KAI9342285                   |
| Olpidium            | <i>Olpidium bornovanus</i>                | Olpidiomycota      | KAG5460860+<br>KAG5458366    |
| Paraphelidium       | <i>Paraphelidium tribonemae</i>           | Aphelidiomycota    | TRINITY_DN24782 <sup>2</sup> |
| Paraphysoderma      | <i>Paraphysoderma sedebokerense</i>       | Blastocladiomycota | KAI9140125                   |
| Phlyctochytrium     | <i>Phlyctochytrium arcticum</i>           | Chytridiomycota    | KAI9095929                   |
| Rhizoclosmatium     | <i>Rhizoclosmatium globosum</i>           | Chytridiomycota    | ORY45507                     |
| Synchytrium         | <i>Synchytrium microbalum</i>             | Chytridiomycota    | XP_031024160                 |
| Zopfochytrium1      | <i>Zopfochytrium polystomum</i>           | Chytridiomycota    | KAI9357369                   |
| Zopfochytrium2      | <i>Zopfochytrium polystomum</i>           | Chytridiomycota    | KAI9325442                   |
| <b>Figure 3</b>     |                                           |                    |                              |
| Amoeboaphelidium    | <i>Amoeboaphelidium<br/>protococcorum</i> | Aphelidiomycota    | KAI3631655                   |
| Amphimedon          | <i>Amphimedon queenslandica</i>           | Porifera           | XP_003384590                 |
| Branchiostoma       | <i>Branchiostoma floridae</i>             | Chordata           | XP_002215000                 |
| Caenorhabditis      | <i>Caenorhabditis elegans</i>             | Nematode           | NP_491219                    |
| Ciona               | <i>Ciona intestinalis</i>                 | Chordata           | XP_002124388                 |
| Drosophila          | <i>Drosophila melanogaster</i>            | Arthropoda         | NP_648881                    |
| Helobdella          | <i>Helobdella robusta</i>                 | Annelida           | XP_009008741                 |
| Homo                | <i>Homo sapiens</i>                       | Chordata           | NP_776245                    |
| Globomyces          | <i>Globomyces pollinis-pini</i>           | Chytridiomycota    | KAI8895260                   |
| Gorgonomycetes      | <i>Gorgonomycetes haynaldii</i>           | Chytridiomycota    | KAI8912823                   |
| Monosiga            | <i>Monosiga brevicollis</i>               | Choanoflagellata   | XP_001743131                 |
| Nematostella        | <i>Nematostella vectensis</i>             | Cnidaria           | XP_001628751                 |
| Strongylocentrotus  | <i>Strongylocentrotus purpuratus</i>      | Echinodermata      | XP_782492                    |
| <b>Figure 4</b>     |                                           |                    |                              |
| Babesia             | <i>Babesia bovis</i>                      | Apicomplexa        | XP_001610770                 |
| Chlamydomonas       | <i>Chlamydomonas reinhardtii</i>          | Chlorophyta        | XP_001695016                 |
| Chlorella           | <i>Chlorella variabilis</i>               | Chlorophyta        | XP_005848932                 |
| Ichthyophthirius    | <i>Ichthyophthirius multifiliis</i>       | Ciliata            | XP_004035172                 |

|                 |                                   |                       |                            |
|-----------------|-----------------------------------|-----------------------|----------------------------|
| Leishmania      | <i>Leishmania major</i>           | Euglenozoa            | XP_001686248               |
| Perkinsus       | <i>Perkinsus marinus</i>          | Perkinsozoa           | XP_002773110               |
| Plasmodium      | <i>Plasmodium falciparum</i>      | Apicomplexa           | XP_001350760               |
| Strigomonas     | <i>Strigomonas culicis</i>        | Euglenozoa            | EPY21771                   |
| Toxoplasma      | <i>Toxoplasma gondii</i>          | Apicomplexa           | XP_002369913.              |
| Trebouxia       | <i>Trebouxia</i> sp. A1-2         | Chlorophyta           | KAA6422911                 |
| Vitrella        | <i>Vitrella brassicaformis</i>    | Chromerida            | CEM02660                   |
| Volvox          | <i>Volvox carteri</i>             | Chlorophyta           | XP_002946668               |
| <b>Figure 5</b> |                                   |                       |                            |
| Babesia         | <i>Babesia bovis</i>              | Apicomplexa           | XP_001609847               |
| Chromera1       | <i>Chromera velia</i>             | Chromerida            | HBKZ010163093 <sup>3</sup> |
| Chromera2       | <i>Chromera velia</i>             | Chromerida            | JO8100183 <sup>3</sup>     |
| Cladochytrium   | <i>Cladochytrium replicatum</i>   | Chytridiomycota       | KAI8808662                 |
| Cryptosporidium | <i>Cryptosporidium parvum</i>     | Apicomplexa           | XP_001388280               |
| Eimeria         | <i>Eimeria tenella</i>            | Apicomplexa           | XP_013231224               |
| Gonapodya       | <i>Gonapodya prolifera</i>        | Monoblepharomycota    | KXS19308                   |
| Gorgonomyces    | <i>Gorgonomyces haynaldii</i>     | Chytridiomycota       | KAI8914275                 |
| Gregarina       | <i>Gregarina niphandrodes</i>     | Apicomplexa           | XP_011128898               |
| Neocallimastix  | <i>Neocallimastix californiae</i> | Neocallimastigomycota | ORY36261                   |
| Perkinsus       | <i>Perkinsus olseni</i>           | Perkinsozoa           | KAF4750811                 |
| Piromyces       | <i>Piromyces finnis</i>           | Neocallimastigomycota | ORX59328                   |
| Plasmodiumf     | <i>Plasmodium falciparum</i>      | Apicomplexa           | XP_002808695               |
| Plasmodiumg     | <i>Plasmodium gallinaceum</i>     | Apicomplexa           | XP_028530755               |
| Powellomyces    | <i>Powellomyces hirtus</i>        | Chytridiomycota       | TPX59886                   |
| Spizellomyces   | <i>Spyzellomyces punctatus</i>    | Chytridiomycota       | XP_016606225               |
| Theileria       | <i>Theileria annulat</i>          | Apicomplexa           | XP_952938                  |
| Toxoplasma      | <i>Toxoplasma gondii</i>          | Apicomplexa           | XP_002364910               |
| Vitrella1       | <i>Vitrella brassicaformis</i>    | Chromerida            | CEM12737                   |

<sup>1</sup>Accession Numbers listed in Table 1 are not shown here.

<sup>2</sup>Taken from [https://figshare.com/articles/dataset/Commun\\_Biol\\_aphelid\\_datasets/7339469/1](https://figshare.com/articles/dataset/Commun_Biol_aphelid_datasets/7339469/1).

<sup>3</sup>TSA

**Table S2.** Nucleotide sequences containing short p25alpha domain in seed plants (Cf. Table 1). The best protein hits of each of these nucleotides in Oomycota are given.

| Plant species                | Order                | Accession<br>Number <sup>1</sup> | Species                         | Accession<br>Number | Query<br>cover, % | Identity,<br>% | (Query<br>cover, %) <sup>3</sup> | (Identity,<br>%) <sup>3</sup> |
|------------------------------|----------------------|----------------------------------|---------------------------------|---------------------|-------------------|----------------|----------------------------------|-------------------------------|
| <i>Panax ginseng</i> 1       | Apiales <sup>2</sup> | GDQW01019137                     | <i>Albugo laibachii</i>         | CCA17632            | 31                | 47.37          | (98)                             | 70.27                         |
|                              |                      |                                  | <i>Aphanomyces astaci</i>       | XP_009825419        | 51                | 33.93          |                                  |                               |
| <i>Panax ginseng</i> 2       | Apiales              | GDQW01005616                     | No hit in Oomycota              |                     |                   |                | (95)                             | (62.50)                       |
| <i>Betula papyrifera</i>     | Fagales              | GEIC01017558                     | <i>Pythium oligandrum</i>       | TMW64959            | 43                | 41.10          |                                  |                               |
|                              |                      |                                  | <i>Aphanomyces euteiches</i>    | KAF0741241          | 65                | 31.62          | (90)                             | (73.57)                       |
| <i>Nicotiana. tabacum</i>    | Solanales            | AM817762*                        | <i>Saprolegnia parasitica</i>   | XP_012194823        | 59                | 25.89          |                                  |                               |
|                              |                      |                                  | <i>Thraustotheca clavata</i>    | OQR96327            | 18                | 51.43          | (100)                            | (47.24)                       |
| <i>Nicotiana. tabacum</i>    | Solanales            | AM824543*                        | <i>Saprolegnia parasitica</i>   | XP_012194823        | 66                | 25.89          |                                  |                               |
|                              |                      |                                  | <i>Thraustotheca clavata</i>    | OQR96327            | 20                | 51.43          | (100)                            | (47.24)                       |
| <i>Colobanthus quitensis</i> | Caryophyllales       | GCIB01125581                     | <i>Thraustotheca clavata</i>    | OQR96327            | 41                | 43.75          |                                  |                               |
|                              |                      |                                  | <i>Pythium oligandrum</i>       | TMW64959            | 45                | 37.14          | (98)                             | (68.03)                       |
| <i>Persicaria minor</i>      | Caryophyllales       | GALN01112310                     | No hit in Oomycota              |                     |                   |                | (79)                             | (58.62)                       |
| <i>Chromolaena odorata</i>   | Asterales            | GACH01135300                     | <i>Peronosclerospora sorghi</i> | KAI9911451          | 64                | 50.00          |                                  |                               |
|                              |                      |                                  | <i>Lagenidium giganteum</i>     | DBA04893            | 86                | 42.50          | (100)                            | (60.34)                       |
| <i>Oryza sativa</i>          | Poales               | CT850609*                        | No hit in Oomycota              |                     |                   |                | (92)                             | (58.11)                       |
| <i>Triticum aestivum</i>     | Poales               | CD868723*                        | No hit in Oomycota              |                     |                   |                | (96)                             | (61.22)                       |

The best hits were searched by BLASTX program [18] in NCBI protein database using the nucleotids listed in the third column as queries. Search in NCBI nucleotide databases by BLASTN program [18] did not result in better hits. <sup>1</sup>Accession Numbers in the third column refer to TSAs or ESTs\*. <sup>2</sup>Color code: blue, Magnoliopsida class, eudicotyledons; green, Magnoliopsida class, monocotyledons (Liliopsida). <sup>3</sup>Numbers in parenthesis are the values of the best hits in Table 1 (i.e., the absolute best hits, not only in Oomycota).
